# Supplementary material for: Corneal biomechanical properties after SMILE versus FLEX, LASIK, LASEK, or PRK: a systematic review and meta-analysis
Source: PubMed Central journal article supplement (PMC6676534; doi:10.1186/s12886-019-1165-3), 2019-08-01
Supplement: 12886_2019_1165_MOESM2_ESM.pdf [file 12886_2019_1165_MOESM2_ESM.pdf]

Appendix 2. Forest Plot of Corneal Hysteresis/Corneal Resistance Factor (CH/CRF) for Studies Comparing Small Incision Lenticule Extraction (SMILE) with Femtosecond Laser-assisted in Situ Keratomileusis (FS-LASIK) from a Sensitivity Analysis.

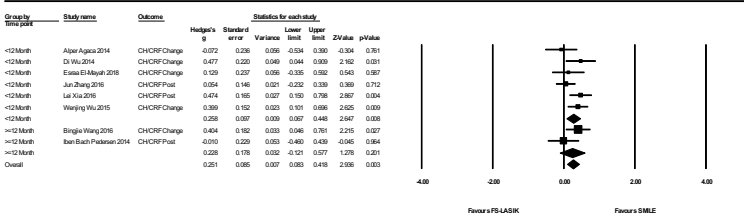

Meta Analysis
